# Supplementary material for: Disclosing the Functional Potency of Three Oxygenated Monoterpenes in Combating Microbial Pathogenesis: From Targeting Virulence Factors to Chicken Meat Preservation
Source: MDPI journal article supplement (doi:10.3390/foods13060965), 2024-03-21
Supplement: s1 [file s1]

**Supplementary Table S1.** Experimental variables and responses used in the mixture design.

| Runs | Variables       |                   |                | MIC <i>S. aureus</i><br>(µg/mL) |        | MIC <i>S. enterica</i><br>(µg/mL) |        | MIC <i>E. coli</i><br>(µg/mL) |        | MIC <i>L. monocytogenes</i><br>(µg/mL) |        |
|------|-----------------|-------------------|----------------|---------------------------------|--------|-----------------------------------|--------|-------------------------------|--------|----------------------------------------|--------|
|      | Linalool<br>(A) | Eucalyptol<br>(B) | Camphor<br>(C) | Exp.                            | Pred.  | Exp.                              | Pred.  | Exp.                          | Pred.  | Exp.                                   | Pred.  |
| 1    | 1.000           | 0.000             | 0.000          | 168±6.765 <sup>d</sup>          | 168.40 | 168±8.25 <sup>d</sup>             | 173.40 | 168±7.84 <sup>c</sup>         | 186.60 | 168±7.755 <sup>e</sup>                 | 155.70 |
| 2    | 0.000           | 1.000             | 0.000          | 168±6.765 <sup>d</sup>          | 195.90 | 168±8.25 <sup>d</sup>             | 187.60 | 168±7.84 <sup>c</sup>         | 197.80 | 168±7.755 <sup>e</sup>                 | 159.50 |
| 3    | 0.000           | 0.000             | 1.000          | 168±6.765 <sup>d</sup>          | 161.00 | 168±8.25 <sup>d</sup>             | 162.20 | 168±7.00 <sup>c</sup>         | 181.40 | 168±7.755 <sup>e</sup>                 | 176.10 |
| 4    | 0.500           | 0.500             | 0.000          | 42±1.681 <sup>b</sup>           | 34.275 | 42±2.05 <sup>b</sup>              | 40.97  | 84±3.28 <sup>b</sup>          | 74.40  | 84±3.854 <sup>d</sup>                  | 76.20  |
| 5    | 0.500           | 0.000             | 0.500          | 84±3.362 <sup>c</sup>           | 93.325 | 10.5±0.50 <sup>a</sup>            | 15.60  | 42±1.64 <sup>a</sup>          | 49.02  | 84±3.854 <sup>d</sup>                  | 83.82  |
| 6    | 0.000           | 0.500             | 0.500          | 84±3.362 <sup>c</sup>           | 77.90  | 42±2.05 <sup>b</sup>              | 39.77  | 42±1.64 <sup>a</sup>          | 40.22  | 42±1.927 <sup>c</sup>                  | 46.57  |
| 7    | 0.333           | 0.333             | 0.333          | 21±0.861 <sup>a</sup>           | 23.34  | 42±2.05 <sup>b</sup>              | 49.27  | 42±1.64 <sup>a</sup>          | 38.90  | 10.5±0.470 <sup>a</sup>                | 13.33  |
| 8    | 0.6667          | 0.1667            | 0.1667         | 42±1.681 <sup>b</sup>           | 55.54  | 84±4.10 <sup>c</sup>              | 78.10  | 42±1.64 <sup>a</sup>          | 41.02  | 21±0.987 <sup>b</sup>                  | 29.60  |
| 9    | 0.1667          | 0.6667            | 0.1667         | 42±1.681 <sup>b</sup>           | 55.44  | 42±2.05 <sup>b</sup>              | 37.55  | 84±3.28 <sup>b</sup>          | 78.33  | 21±0.987 <sup>b</sup>                  | 28.44  |
| 10   | 0.1667          | 0.1667            | 0.6667         | 42±1.681 <sup>b</sup>           | 49.80  | 42±2.05 <sup>b</sup>              | 40.63  | 84±3.28 <sup>b</sup>          | 87.51  | 84±3.854 <sup>d</sup>                  | 79.52  |

Exp: Experimental, Pred: Predicted. For each run, responses with different letters are significantly different (one-way analysis of variance,  $p < 0.05$ ; Tukey's test),  $\pm$  standard deviation (SD) of three measurements.

**Supplementary Table S2.** ANOVA results of regression models from mixture design for MICs optimization

| Source                | DF | Seq SS  | Adj SS  | Adj MS  | F-value | <i>p</i> -value |
|-----------------------|----|---------|---------|---------|---------|-----------------|
| <i>S. aureus</i>      |    |         |         |         |         |                 |
| <b>Regression</b>     | 6  | 33809.2 | 33809.2 | 5634.9  | 5.93    | 0.086           |
| <b>Linear</b>         | 2  | 446.3   | 744.9   | 372.5   | 0.39    | 0.706           |
| <b>Quadratic</b>      | 3  | 33354.7 | 21038.4 | 7012.8  | 7.38    | 0.067           |
| <b>A × B</b>          | 1  | 17760.7 | 14773.8 | 14773.8 | 15.55   | 0.029           |
| <b>A × C</b>          | 1  | 7173.6  | 5884.5  | 5884.5  | 6.19    | 0.089           |
| <b>B × C</b>          | 1  | 8420.3  | 6831.3  | 6831.3  | 7.19    | 0.075           |
| <b>Special cubic</b>  | 1  | 8.2     | 8.2     | 8.2     | 0.01    | 0.932           |
| <b>A × B × C</b>      | 1  | 8.2     | 8.2     | 8.2     | 0.01    | 0.932           |
| <b>Residual Error</b> | 3  | 2850.9  | 2850.9  | 950.3   |         |                 |
| <b>Total</b>          | 9  | 36660.1 |         |         |         |                 |
| <i>S. enterica</i>    |    |         |         |         |         |                 |
| <b>Regression</b>     | 6  | 37765.8 | 37765.8 | 6294.3  | 10.51   | 0.040           |
| <b>Linear</b>         | 2  | 724.1   | 355.5   | 177.7   | 0.30    | 0.763           |
| <b>Quadratic</b>      | 3  | 34211.1 | 32108.2 | 10702.7 | 17.87   | 0.020           |
| <b>A × B</b>          | 1  | 10103.9 | 13154.3 | 13154.3 | 21.97   | 0.018           |
| <b>A × C</b>          | 1  | 12682.2 | 15654.2 | 15654.2 | 26.14   | 0.014           |
| <b>B × C</b>          | 1  | 11425   | 14229.7 | 14229.7 | 23.76   | 0.016           |
| <b>Special cubic</b>  | 1  | 2830.7  | 2830.7  | 2830.7  | 4.73    | 0.118           |
| <b>A × B × C</b>      | 1  | 2830.7  | 2830.7  | 2830.7  | 4.73    | 0.118           |
| <b>Residual Error</b> | 3  | 1796.6  | 1796.6  | 598.9   |         |                 |
| <b>Total</b>          | 9  | 39562.4 |         |         |         |                 |
| <i>E. coli</i>        |    |         |         |         |         |                 |
| <b>Regression</b>     | 6  | 35114.3 | 35114.3 | 5852.4  | 11.83   | 0.034           |
| <b>Linear</b>         | 2  | 434.8   | 153.9   | 76.9    | 0.16    | 0.862           |
| <b>Quadratic</b>      | 3  | 34429.6 | 24644.8 | 8214.9  | 16.6    | 0.023           |
| <b>A × B</b>          | 1  | 9525    | 9375.2  | 9375.2  | 18.95   | 0.022           |
| <b>A × C</b>          | 1  | 12939   | 12309.8 | 12309.8 | 24.88   | 0.015           |
| <b>B × C</b>          | 1  | 11965.6 | 11311.1 | 11311.1 | 22.86   | 0.017           |

|                         |   |         |         |         |       |       |
|-------------------------|---|---------|---------|---------|-------|-------|
| <b>Special cubic</b>    | 1 | 249.9   | 249.9   | 249.2   | 0.51  | 0.529 |
| <b>A × B × C</b>        | 1 | 249.9   | 249.9   | 249.9   | 0.51  | 0.529 |
| <b>Residual Error</b>   | 3 | 1484.6  | 1484.6  | 494.9   |       |       |
| <b>Total</b>            | 9 | 36598.9 |         |         |       |       |
| <i>L. monocytogenes</i> |   |         |         |         |       |       |
| <b>Regression</b>       | 6 | 32059.3 | 32059.3 | 5343.22 | 5.54  | 0.094 |
| <b>Linear</b>           | 2 | 322.3   | 258.6   | 129.31  | 0.13  | 0.880 |
| <b>Quadratic</b>        | 3 | 30903   | 15175   | 5058.33 | 5.24  | 0.103 |
| <b>A × B</b>            | 1 | 8638.8  | 5521.6  | 5521.57 | 5.72  | 0.097 |
| <b>A × C</b>            | 1 | 7392.9  | 4552.2  | 4552.15 | 4.72  | 0.118 |
| <b>B × C</b>            | 1 | 14871.2 | 9928.2  | 9928.15 | 10.29 | 0.049 |
| <b>Special cubic</b>    | 1 | 834     | 834     | 834.01  | 0.86  | 0.421 |
| <b>A × B × C</b>        | 1 | 834     | 834     | 834.01  | 0.86  | 0.421 |
| <b>Residual Error</b>   | 3 | 2895.1  | 2895.1  | 965.02  |       |       |
| <b>Total</b>            | 9 | 34954.4 |         |         |       |       |
